# Supplementary material for: Burkholderia pseudomallei in a lowland rice paddy: seasonal changes and influence of soil depth and physico-chemical properties
Source: PubMed Central journal article supplement (PMC5465195; doi:10.1038/s41598-017-02946-z), 2017-06-08

## Supplementary Data

### ***Burkholderia pseudomallei* in a lowland rice paddy: seasonal changes and influence of soil depth and physico-chemical properties**

Manivanh L<sup>1,2</sup>, Pierret A<sup>3</sup>, Rattanavong S<sup>2</sup>, Kounnavongsa O<sup>1</sup>, Buisson Y<sup>1</sup>, Elliott I<sup>2,4</sup>,  
Maeght J-L<sup>5</sup>, Xayyathip K<sup>3</sup>, Silisouk J<sup>2</sup>, Vongsouvath M<sup>2</sup>, Phetsouvanh R<sup>2,4+</sup>, Newton PN<sup>2,4</sup>,  
Lacombe G<sup>6</sup>, Ribolzi O<sup>7</sup>, Rochelle-Newall E<sup>8</sup>, Dance DAB<sup>\*2,4,9</sup>

<sup>1</sup> Institut de la Francophonie pour la Médecine Tropicale, BP 9519, Vientiane, Lao People's Democratic Republic

<sup>2</sup> Lao-Oxford-Mahosot Hospital-Wellcome Trust Research Unit, Microbiology Laboratory, Mahosot Hospital, Vientiane, Lao People's Democratic Republic

<sup>3</sup> iEES-Paris (IRD-Sorbonne Universités -UPMC-CNRS-INRA-UDD-UPEC), c/o Department of Agricultural Land Management (DALaM), Vientiane, Laos

<sup>4</sup> Centre for Tropical Medicine & Global Health, University of Oxford, UK

<sup>5</sup> iEES-Paris (IRD-Sorbonne Universités -UPMC-CNRS-INRA-UDD-UPEC), c/o Soils and Fertilizers Research Institute (SFRI), Hanoi, Vietnam

<sup>6</sup> International Water Management Institute (IWMI), Southeast Asia Regional Office, PO BOX 4199, Vientiane, Lao PDR

<sup>7</sup> Géosciences Environnement Toulouse – GET (IRD, Université de Toulouse, CNES, CNRS, UPS) 31400 Toulouse, France

<sup>8</sup> iEES-Paris (IRD-Sorbonne Universités -UPMC-CNRS-INRA-UDD-UPEC), Université Pierre et Marie-Curie, Paris, France

<sup>9</sup> Faculty of Infectious and Tropical Diseases, London School of Hygiene and Tropical Medicine, London, UK

+ Deceased

\*Corresponding author: David Dance

Running title: *Burkholderia pseudomallei* in a Lao rice paddy

**Table s.1**

*B. pseudomallei* count (CFU g<sup>-1</sup>), Soil Bulk Density (Mg m<sup>-3</sup>), Soil Water Content (g g<sup>-1</sup>), for each sampling quadrat at each of the four sampling depths and for each sampling round. Missing values are indicated by "NA".

**Table s.2**

Soil analyses for a selection of 58 samples. Organic Matter (g kg<sup>-1</sup>); Total organic C (g kg<sup>-1</sup>, NF ISO 10694) and Total organic N (g kg<sup>-1</sup>, NF ISO 13878); C/N; P2O5 (g kg<sup>-1</sup>, Olsen method; NF ISO 11263); Cation Exchange Capacity – CEC (cmol+ kg<sup>-1</sup>, Metson method, NF X 31-130).

**Table s.3**

Soil pH (H<sub>2</sub>O) for a selection of 98 samples.

Table s.1

| Sample | X (m) | Y (m) | Depth (cm) | <i>B. pseudomallei</i> count (CFU g <sup>-1</sup> ) |        |        |        | Positivity | Soil Bulk Density (Mg m <sup>-3</sup> ) |        |        |        | Soil Water Content (g g <sup>-1</sup> ) |        |        |        |
|--------|-------|-------|------------|-----------------------------------------------------|--------|--------|--------|------------|-----------------------------------------|--------|--------|--------|-----------------------------------------|--------|--------|--------|
|        |       |       |            | Apr-11                                              | Jun-11 | Nov-11 | Apr-12 |            | Apr-11                                  | Jun-11 | Nov-11 | Apr-12 | Apr-11                                  | Jun-11 | Nov-11 | Apr-12 |
| 1.1    | 2.5   | 2.5   | 5          | 0                                                   | 0      | 0      | 0      | 0          | 1.38                                    | 1.64   | 1.5    | 1.23   | 17.22                                   | 20.46  | 24.51  | 21.15  |
| 1.2    | 2.5   | 2.5   | 30         | 0                                                   | 6      | 25     | 950    | 3          | 1.34                                    | 1.54   | 1.4    | 1.33   | 23.33                                   | 23.96  | 26.38  | 27.45  |
| 1.3    | 2.5   | 2.5   | 60         | 20                                                  | NA     | 74     | 1800   | 3          | 1.44                                    | NA     | 1.42   | 1.66   | 24.48                                   | NA     | 30.28  | 19.24  |
| 1.4    | 2.5   | 2.5   | 90         | 142                                                 | NA     | NA     | NA     | 1          | 1.53                                    | NA     | NA     | NA     | 23.31                                   | NA     | NA     | NA     |
| 2.1    | 2.5   | 7.5   | 5          | 0                                                   | 0      | 0      | 0      | 0          | 1.43                                    | 1.61   | 1.31   | 1.42   | 15.38                                   | 19.88  | 26.64  | 20.12  |
| 2.2    | 2.5   | 7.5   | 30         | 10                                                  | 0      | 0      | 0      | 1          | 1.52                                    | 1.43   | 1.3    | 1.46   | 21.39                                   | 26.82  | 31.75  | 22.21  |
| 2.3    | 2.5   | 7.5   | 60         | 25                                                  | NA     | 0      | 230    | 2          | 1.55                                    | NA     | 1.5    | 1.47   | 25.31                                   | NA     | 27.06  | 26.45  |
| 2.4    | 2.5   | 7.5   | 90         | 25                                                  | NA     | NA     | 180    | 2          | 1.28                                    | NA     | NA     | 1.4    | 29.11                                   | NA     | NA     | 27.97  |
| 3.1    | 2.5   | 12.5  | 5          | 0                                                   | 0      | 20     | 0      | 0          | 1.55                                    | 1.56   | 1.47   | 1.45   | 17.32                                   | 19.94  | 24.31  | 19.31  |
| 3.2    | 2.5   | 12.5  | 30         | 0                                                   | 1358   | 65     | 0      | 2          | 1.38                                    | 1.51   | 1.44   | 1.48   | 18.71                                   | 24.26  | 26.92  | 23.76  |
| 3.3    | 2.5   | 12.5  | 60         | 400                                                 | NA     | 420    | 10     | 2          | 1.59                                    | NA     | 1.5    | 1.45   | 25.2                                    | NA     | 24.35  | 25.07  |
| 3.4    | 2.5   | 12.5  | 90         | 3980                                                | NA     | NA     | 70     | 2          | 1.58                                    | NA     | NA     | 1.15   | 24.02                                   | NA     | NA     | 24.45  |
| 4.1    | 2.5   | 17.5  | 5          | 0                                                   | 0      | 0      | 1      | 1          | 1.75                                    | 1.63   | 1.38   | 1.48   | 12.17                                   | 18.83  | 26.36  | 20.89  |
| 4.2    | 2.5   | 17.5  | 30         | 0                                                   | 0      | 83     | 0      | 1          | 1.57                                    | 1.71   | 1.53   | 1.51   | 20.42                                   | 24.39  | 25.78  | 16.47  |
| 4.3    | 2.5   | 17.5  | 60         | 75                                                  | NA     | 295    | 0      | 2          | 1.69                                    | NA     | 1.59   | 1.56   | 22.19                                   | NA     | 24.05  | 22.12  |
| 4.4    | 2.5   | 17.5  | 90         | 140                                                 | NA     | NA     | 650    | 2          | 1.56                                    | NA     | NA     | 1.58   | 24.67                                   | NA     | NA     | 24.46  |
| 5.1    | 2.5   | 22.5  | 5          | 0                                                   | 0      | 0      | 0      | 0          | 1.5                                     | 1.42   | 1.26   | 1.45   | 17.74                                   | 25.86  | 29.35  | 23.55  |
| 5.2    | 2.5   | 22.5  | 30         | 0                                                   | 0      | 0      | 0      | 0          | 1.53                                    | 1.63   | 1.53   | 1.5    | 16.82                                   | 20.01  | 24.59  | 24.12  |
| 5.3    | 2.5   | 22.5  | 60         | 2                                                   | NA     | 100    | 100    | 3          | 1.51                                    | NA     | 1.5    | 1.54   | 24.35                                   | NA     | 25.14  | 21.76  |
| 5.4    | 2.5   | 22.5  | 90         | 0                                                   | NA     | NA     | 0      | 0          | 1.59                                    | NA     | NA     | 1.54   | 23.27                                   | NA     | NA     | 20.1   |
| 6.1    | 2.5   | 27.5  | 5          | 0                                                   | 0      | 0      | 0      | 0          | 1.7                                     | 1.23   | 1.36   | 1.24   | 17.09                                   | 30     | 31.23  | 25.78  |
| 6.2    | 2.5   | 27.5  | 30         | 0                                                   | 35     | 7      | 50     | 3          | 1.64                                    | 1.46   | 1.49   | 1.56   | 21.5                                    | 31.81  | 22.39  | 21.25  |
| 6.3    | 2.5   | 27.5  | 60         | 10                                                  | NA     | 265    | 600    | 3          | 1.71                                    | NA     | 1.62   | 1.55   | 17.83                                   | NA     | 21.94  | 20.25  |
| 6.4    | 2.5   | 27.5  | 90         | 50                                                  | NA     | NA     | 70     | 2          | 2.17                                    | NA     | NA     | 1.64   | 5.02                                    | NA     | NA     | 18.09  |
| 7.1    | 2.5   | 32.5  | 5          | 0                                                   | 0      | 0      | 0      | 0          | 1.6                                     | 1.41   | 1.19   | 1.43   | 16.02                                   | 27.8   | 30.74  | 21.15  |
| 7.2    | 2.5   | 32.5  | 30         | 1                                                   | 20     | 0      | 0      | 2          | 1.47                                    | 1.66   | 1.48   | 1.46   | 20.21                                   | 17.95  | 19.98  | 22.49  |
| 7.3    | 2.5   | 32.5  | 60         | 0                                                   | NA     | 5      | 0      | 1          | 1.69                                    | NA     | 1.7    | 1.68   | 18.48                                   | NA     | 22.39  | 20.62  |
| 7.4    | 2.5   | 32.5  | 90         | 1                                                   | NA     | NA     | 0      | 1          | 1.65                                    | NA     | NA     | 1.55   | 18.53                                   | NA     | NA     | 21.24  |
| 8.1    | 7.5   | 2.5   | 5          | 0                                                   | 0      | 0      | 0      | 0          | 1.46                                    | 1.46   | 1.45   | 1.67   | 17.9                                    | 24.86  | 28.08  | 15.15  |
| 8.2    | 7.5   | 2.5   | 30         | 275                                                 | 3100   | 12     | 150    | 4          | 1.51                                    | 1.45   | 1.53   | 1.45   | 17.53                                   | 26.77  | 23.82  | 19.86  |
| 8.3    | 7.5   | 2.5   | 60         | 325                                                 | NA     | 218    | 410    | 3          | 1.57                                    | NA     | 1.54   | 1.46   | 20.52                                   | NA     | 24.63  | 25.39  |
| 8.4    | 7.5   | 2.5   | 90         | 0                                                   | NA     | NA     | 850    | 1          | 1.56                                    | NA     | NA     | 1.68   | 24.26                                   | NA     | NA     | 22.9   |
| 9.1    | 7.5   | 7.5   | 5          | 1                                                   | 0      | 0      | 1      | 2          | 1.63                                    | 1.51   | 1.47   | 1.53   | 15.77                                   | 26.78  | 24.7   | 18.75  |
| 9.2    | 7.5   | 7.5   | 30         | 0                                                   | 0      | 90     | 0      | 1          | 1.52                                    | 1.59   | 1.36   | 1.55   | 20.47                                   | 22.25  | 27.55  | 19.47  |
| 9.3    | 7.5   | 7.5   | 60         | 15                                                  | NA     | 5060   | 0      | 2          | 1.53                                    | NA     | 1.53   | 1.38   | 22.87                                   | NA     | 23.43  | 29.43  |
| 9.4    | 7.5   | 7.5   | 90         | 362                                                 | NA     | NA     | 500    | 2          | 1.28                                    | NA     | NA     | 1.43   | 30.42                                   | NA     | NA     | 22.7   |
| 10.1   | 7.5   | 12.5  | 5          | 0                                                   | 0      | 0      | 0      | 0          | 1.52                                    | 1.35   | 1.41   | 1.3    | 17.87                                   | 27.15  | 26.12  | 22.25  |
| 10.2   | 7.5   | 12.5  | 30         | 0                                                   | 0      | 0      | 0      | 0          | 1.57                                    | 1.47   | 1.56   | 1.53   | 21.7                                    | 23.88  | 24.66  | 21.25  |

|      |      |      |    |     |      |      |      |   |      |      |      |      |       |       |       |       |
|------|------|------|----|-----|------|------|------|---|------|------|------|------|-------|-------|-------|-------|
| 10.3 | 7.5  | 12.5 | 60 | 0   | 0    | 0    | 600  | 1 | 1.46 | 1.61 | 1.57 | 1.47 | 26.18 | 21.74 | 23.07 | 27.87 |
| 10.4 | 7.5  | 12.5 | 90 | 690 | NA   | NA   | 0    | 1 | 1.36 | NA   | NA   | 1.21 | 32.39 | NA    | NA    | 29.77 |
| 11.1 | 7.5  | 17.5 | 5  | 0   | 0    | 0    | 0    | 0 | 1.39 | 1.68 | 1.41 | 1.33 | 13.3  | 19.34 | 28.61 | 19.02 |
| 11.2 | 7.5  | 17.5 | 30 | 5   | 0    | 0    | 10   | 2 | 1.51 | 1.61 | 1.58 | 1.43 | 18.06 | 21.41 | 21.65 | 22.25 |
| 11.3 | 7.5  | 17.5 | 60 | 0   | NA   | 73   | 65   | 2 | 1.47 | NA   | 1.34 | 1.5  | 21.63 | NA    | 30.63 | 24.31 |
| 11.4 | 7.5  | 17.5 | 90 | 0   | NA   | NA   | 10   | 1 | 1.24 | NA   | NA   | NA   | 36.34 | NA    | NA    | NA    |
| 12.1 | 7.5  | 22.5 | 5  | 0   | 0    | 0    | 0    | 0 | 1.72 | 1.47 | 1.4  | 1.24 | 16.38 | 23.19 | 27.16 | 22.48 |
| 12.2 | 7.5  | 22.5 | 30 | 0   | 0    | 0    | 50   | 1 | 1.55 | 1.46 | 1.55 | 1.59 | 19.42 | 24.56 | 23.87 | 20.51 |
| 12.3 | 7.5  | 22.5 | 60 | 127 | NA   | 6778 | 300  | 3 | 1.52 | NA   | 1.32 | 1.25 | 24.12 | NA    | 30.35 | 28.69 |
| 12.4 | 7.5  | 22.5 | 90 | 5   | NA   | NA   | 1400 | 2 | 1.3  | NA   | NA   | NA   | 27.56 | NA    | NA    | NA    |
| 13.1 | 7.5  | 27.5 | 5  | 0   | 0    | 0    | 0    | 0 | 1.42 | 1.42 | 1.31 | 1.47 | 20.86 | 26.07 | 31.44 | 20.86 |
| 13.2 | 7.5  | 27.5 | 30 | 0   | 0    | 0    | 0    | 0 | 1.6  | 1.57 | 1.48 | 1.48 | 20.59 | 22.26 | 22.81 | 22.71 |
| 13.3 | 7.5  | 27.5 | 60 | 0   | NA   | 0    | 125  | 1 | 1.46 | NA   | 1.44 | 1.51 | 27.56 | NA    | 27.55 | 23.41 |
| 13.4 | 7.5  | 27.5 | 90 | 50  | NA   | 0    | 1    | 2 | 1.46 | NA   | 1.49 | 1.41 | 24.01 | NA    | 27.29 | 25.74 |
| 14.1 | 7.5  | 32.5 | 5  | 0   | 0    | 0    | 0    | 0 | 1.66 | 1.4  | 1.28 | 1.37 | 18.29 | 27.57 | 31.44 | 26.15 |
| 14.2 | 7.5  | 32.5 | 30 | 0   | 0    | 0    | 0    | 0 | 1.52 | 1.64 | 1.45 | 1.57 | 21.37 | 21.45 | 21.78 | 19.3  |
| 14.3 | 7.5  | 32.5 | 60 | 375 | NA   | 0    | 0    | 1 | 1.63 | NA   | 1.53 | 1.62 | 20.38 | NA    | 26.82 | 21.08 |
| 14.4 | 7.5  | 32.5 | 90 | 0   | NA   | NA   | 0    | 0 | 1.7  | NA   | NA   | 1.55 | 19.28 | NA    | NA    | 21.07 |
| 15.1 | 12.5 | 2.5  | 5  | 0   | 5    | 0    | 0    | 1 | 1.62 | 1.45 | 1.51 | 1.49 | 15.68 | 26.9  | 25.38 | 19.52 |
| 15.2 | 12.5 | 2.5  | 30 | 0   | 0    | 0    | 30   | 1 | 1.47 | 1.5  | 1.47 | 1.49 | 23.34 | 23.78 | 22.63 | 22.28 |
| 15.3 | 12.5 | 2.5  | 60 | 0   | NA   | 0    | 0    | 0 | 1.58 | NA   | 1.51 | 1.29 | 22.85 | NA    | 24.95 | 28.63 |
| 15.4 | 12.5 | 2.5  | 90 | 1   | NA   | NA   | NA   | 1 | 1.31 | NA   | NA   | NA   | 34.77 | NA    | NA    | NA    |
| 16.1 | 12.5 | 7.5  | 5  | 0   | 0    | 0    | 0    | 0 | 1.71 | 1.34 | 1.41 | 1.39 | 17.02 | 25.95 | 28.83 | 20.39 |
| 16.2 | 12.5 | 7.5  | 30 | 0   | 190  | 0    | 0    | 1 | 1.62 | 1.59 | 1.54 | 1.51 | 18.22 | 22.95 | 24.74 | 21.99 |
| 16.3 | 12.5 | 7.5  | 60 | 0   | NA   | 39   | 0    | 1 | 1.54 | NA   | 1.58 | 1.49 | 22.56 | NA    | 24.62 | 23.68 |
| 16.4 | 12.5 | 7.5  | 90 | 1   | NA   | NA   | NA   | 1 | 1.32 | NA   | NA   | NA   | 34.25 | NA    | NA    | NA    |
| 17.1 | 12.5 | 12.5 | 5  | 0   | 2500 | 0    | 0    | 1 | 1.57 | 1.47 | 1.21 | 1.33 | 17.42 | 24.44 | 26.22 | 18.31 |
| 17.2 | 12.5 | 12.5 | 30 | 0   | 0    | 0    | 0    | 0 | 1.62 | 1.55 | 1.51 | 1.04 | 19.42 | 22.78 | 23.86 | 15.59 |
| 17.3 | 12.5 | 12.5 | 60 | 75  | NA   | 0    | 0    | 1 | 1.63 | NA   | 1.3  | 1.32 | 21.47 | NA    | 36.32 | 24.02 |
| 17.4 | 12.5 | 12.5 | 90 | 100 | NA   | NA   | 0    | 1 | 1.55 | NA   | NA   | 1.47 | 24.32 | NA    | NA    | 23.34 |
| 18.1 | 12.5 | 17.5 | 5  | 20  | 0    | 0    | 0    | 1 | 1.69 | 1.65 | 1.42 | 1.33 | 15.16 | 17.88 | 27.53 | 21.77 |
| 18.2 | 12.5 | 17.5 | 30 | 0   | 0    | 0    | 0    | 0 | 1.46 | 1.55 | 1.5  | 1.61 | 21.67 | 21.3  | 23.38 | 20.48 |
| 18.3 | 12.5 | 17.5 | 60 | 40  | 0    | 0    | 0    | 1 | 1.4  | NA   | 1.39 | 1.45 | 28.73 | NA    | 32.42 | 24.13 |
| 18.4 | 12.5 | 17.5 | 90 | 400 | NA   | NA   | 1    | 2 | 1.56 | NA   | NA   | NA   | 21.18 | NA    | NA    | NA    |
| 19.1 | 12.5 | 22.5 | 5  | 0   | 0    | 0    | 0    | 0 | 1.53 | 1.33 | 1.18 | 1.4  | 21.06 | 28.5  | 29.6  | 18.81 |
| 19.2 | 12.5 | 22.5 | 30 | 0   | 0    | 0    | 450  | 1 | 1.52 | 1.54 | 1.49 | 1.48 | 21.1  | 21.41 | 24.88 | 21.63 |
| 19.3 | 12.5 | 22.5 | 60 | 0   | 4    | 52   | 450  | 3 | 1.32 | 1.56 | 1.49 | 1.49 | 24.83 | 23.84 | 25.46 | 26.12 |
| 19.4 | 12.5 | 22.5 | 90 | 145 | NA   | NA   | 100  | 2 | 1.28 | NA   | NA   | 1.46 | 32.79 | NA    | NA    | 24.29 |
| 20.1 | 12.5 | 27.5 | 5  | 0   | 0    | 0    | 0    | 0 | 1.61 | 1.45 | 1.42 | 1.39 | 17.04 | 23.96 | 30.59 | 19.71 |
| 20.2 | 12.5 | 27.5 | 30 | 34  | 0    | 0    | 0    | 1 | 1.6  | 1.47 | 1.45 | 1.54 | 19.99 | 25.66 | 26.44 | 19.47 |
| 20.3 | 12.5 | 27.5 | 60 | 393 | NA   | 106  | 0    | 2 | 1.49 | NA   | 1.33 | 1.26 | 24.92 | NA    | 29.82 | 26.47 |
| 20.4 | 12.5 | 27.5 | 90 | 20  | NA   | NA   | 0    | 1 | 1.52 | NA   | NA   | 1.28 | 24.33 | NA    | NA    | 27.81 |
| 21.1 | 12.5 | 32.5 | 5  | 0   | 0    | 128  | 0    | 1 | 1.65 | 1.5  | 1.3  | 1.43 | 17.17 | 22.84 | 29.11 | 21.34 |
| 21.2 | 12.5 | 32.5 | 30 | 1   | 1    | 0    | 0    | 2 | 1.6  | 1.71 | 1.61 | 1.49 | 17.96 | 17.65 | 21.05 | 19    |

|      |      |      |    |     |     |    |      |   |      |      |      |      |       |       |       |       |
|------|------|------|----|-----|-----|----|------|---|------|------|------|------|-------|-------|-------|-------|
| 21.3 | 12.5 | 32.5 | 60 | 110 | 405 | 83 | 0    | 3 | 1.44 | 1.44 | 1.3  | 1.38 | 27.17 | 29.57 | 39.91 | 31    |
| 21.4 | 12.5 | 32.5 | 90 | 55  | NA  | NA | 0    | 1 | 1.47 | NA   | NA   | 1.42 | 27.77 | NA    | NA    | 24.45 |
| 22.1 | 17.5 | 2.5  | 5  | 0   | 0   | 0  | 1350 | 1 | 1.56 | 1.54 | 1.44 | 1.36 | 17.61 | 22.73 | 26.2  | 17.19 |
| 22.2 | 17.5 | 2.5  | 30 | 0   | 0   | 0  | 200  | 1 | 1.58 | 1.5  | 1.52 | 1.48 | 21.37 | 24.53 | 23.36 | 23.28 |
| 22.3 | 17.5 | 2.5  | 60 | 0   | 0   | 0  | 300  | 1 | 1.58 | NA   | 1.6  | 1.16 | 22.02 | NA    | 22.92 | 23.88 |
| 22.4 | 17.5 | 2.5  | 90 | 60  | NA  | NA | 2750 | 2 | 1.58 | NA   | NA   | 1.44 | 24.37 | NA    | NA    | 27.3  |
| 23.1 | 17.5 | 7.5  | 5  | 0   | 0   | 0  | 0    | 0 | 1.64 | 1.42 | 1.38 | 1.51 | 17.49 | 24.53 | 27.74 | 19.33 |
| 23.2 | 17.5 | 7.5  | 30 | 0   | 490 | 2  | 0    | 2 | 1.46 | 1.4  | 1.43 | 1.35 | 26.01 | 29.09 | 28.5  | 21.01 |
| 23.3 | 17.5 | 7.5  | 60 | 0   | NA  | 0  | 680  | 1 | 1.47 | NA   | 1.69 | 1.22 | 24.75 | NA    | 21.59 | 22.04 |
| 23.4 | 17.5 | 7.5  | 90 | 0   | NA  | NA | 0    | 0 | 1.63 | NA   | NA   | 1.36 | 20.78 | NA    | NA    | 21.85 |
| 24.1 | 17.5 | 12.5 | 5  | 0   | 0   | 23 | 0    | 1 | 1.49 | 1.58 | 1.34 | 1.38 | 16.52 | 24.68 | 30.56 | 18.6  |
| 24.2 | 17.5 | 12.5 | 30 | 0   | 0   | 0  | 0    | 0 | 1.56 | 1.5  | 1.53 | 1.19 | 18.3  | 23.4  | 20.29 | 16.48 |
| 24.3 | 17.5 | 12.5 | 60 | 4   | NA  | 13 | 0    | 2 | 1.58 | NA   | 1.58 | 1.57 | 22.82 | NA    | 24.92 | 21.44 |
| 24.4 | 17.5 | 12.5 | 90 | 35  | NA  | NA | 0    | 1 | 1.56 | NA   | NA   | 1.36 | 21.2  | NA    | NA    | 30.12 |
| 25.1 | 17.5 | 17.5 | 5  | 0   | 0   | 0  | 0    | 0 | 1.62 | 1.4  | 1.26 | 1.4  | 15.15 | 23.6  | 28.84 | 19.94 |
| 25.2 | 17.5 | 17.5 | 30 | 1   | 0   | 0  | 0    | 1 | 1.53 | 1.42 | 1.26 | 1.53 | 20.48 | 26.84 | 24.03 | 20.12 |
| 25.3 | 17.5 | 17.5 | 60 | 550 | NA  | 0  | 50   | 2 | 1.39 | NA   | 1.41 | 1.39 | 30.76 | NA    | 27.5  | 28.07 |
| 25.4 | 17.5 | 17.5 | 90 | 850 | NA  | NA | 4050 | 2 | 1.42 | NA   | NA   | NA   | 30.02 | NA    | NA    | NA    |
| 26.1 | 17.5 | 22.5 | 5  | 0   | 0   | 36 | 0    | 1 | 1.59 | 1.35 | 1.35 | 1.38 | 16.72 | 27.45 | 33.25 | 22.88 |
| 26.2 | 17.5 | 22.5 | 30 | 250 | 0   | 5  | 0    | 2 | 1.56 | 1.53 | 1.49 | 1.55 | 22.82 | 23.14 | 25.7  | 19.99 |
| 26.3 | 17.5 | 22.5 | 60 | 0   | NA  | 22 | 0    | 1 | 1.24 | NA   | 1.49 | 1.51 | 30.6  | NA    | 26.24 | 23.36 |
| 26.4 | 17.5 | 22.5 | 90 | 1   | NA  | NA | 0    | 1 | 1.3  | NA   | NA   | 1.5  | 28.98 | NA    | NA    | 22.32 |
| 27.1 | 17.5 | 27.5 | 5  | 0   | 0   | 0  | 0    | 0 | 1.56 | 1.36 | 1.3  | 1.46 | 20.46 | 27.63 | 31.41 | 21.67 |
| 27.2 | 17.5 | 27.5 | 30 | 0   | 0   | 0  | 100  | 1 | 1.63 | 1.32 | 1.36 | 1.3  | 19.81 | 28.72 | 26.24 | 19.71 |
| 27.3 | 17.5 | 27.5 | 60 | 0   | NA  | 0  | 15   | 1 | 1.54 | NA   | 1.37 | 1.47 | 24.17 | NA    | 28.39 | 24.27 |
| 27.4 | 17.5 | 27.5 | 90 | 45  | NA  | NA | 250  | 2 | 1.32 | NA   | NA   | 1.04 | 27.54 | NA    | NA    | 27.09 |
| 28.1 | 17.5 | 32.5 | 5  | 0   | 0   | 0  | 0    | 0 | 1.58 | 1.54 | 1.27 | 1.51 | 16.23 | 26.25 | 31.57 | 20.43 |
| 28.2 | 17.5 | 32.5 | 30 | 20  | 0   | 0  | 0    | 1 | 1.41 | 1.51 | 1.4  | 1.38 | 24.37 | 23.92 | 25.29 | 26.67 |
| 28.3 | 17.5 | 32.5 | 60 | 14  | 0   | 0  | 0    | 1 | 1.62 | 1.46 | 1.35 | 1.45 | 20.77 | 27.44 | 30.88 | 24.03 |
| 28.4 | 17.5 | 32.5 | 90 | 20  | NA  | NA | 100  | 2 | 1.56 | NA   | NA   | 1.56 | 23.85 | NA    | NA    | 22.15 |
| 29.1 | 22.5 | 2.5  | 5  | 0   | 0   | 0  | 0    | 0 | 1.64 | 1.58 | 1.36 | 1.55 | 16.64 | 22.22 | 26.5  | 18.7  |
| 29.2 | 22.5 | 2.5  | 30 | 0   | 0   | 0  | 0    | 0 | 1.67 | 1.62 | 1.56 | 1.46 | 20.14 | 21.57 | 24.45 | 21.37 |
| 29.3 | 22.5 | 2.5  | 60 | 0   | 0   | 0  | 0    | 0 | 1.59 | 1.63 | 1.59 | 1.62 | 22.17 | 23.5  | 24.24 | 21.85 |
| 29.4 | 22.5 | 2.5  | 90 | 0   | NA  | NA | 0    | 0 | 1.58 | NA   | NA   | 1.51 | 23.15 | NA    | NA    | 23.51 |
| 30.1 | 22.5 | 7.5  | 5  | 0   | 0   | 0  | 0    | 0 | 1.5  | 1.43 | 1.44 | 1.33 | 21.12 | 25.44 | 23.58 | 20.38 |
| 30.2 | 22.5 | 7.5  | 30 | 0   | 0   | 0  | 0    | 0 | 1.57 | 1.52 | 1.56 | 1.52 | 21    | 24.37 | 22.93 | 21.77 |
| 30.3 | 22.5 | 7.5  | 60 | 0   | 0   | 0  | 0    | 0 | 1.59 | 1.54 | 1.63 | 1.49 | 22.64 | 23.78 | 23.53 | 22.71 |
| 30.4 | 22.5 | 7.5  | 90 | 15  | NA  | NA | 250  | 2 | 1.64 | NA   | NA   | 1.38 | 22.52 | NA    | NA    | 23.44 |
| 31.1 | 22.5 | 12.5 | 5  | 0   | 145 | 0  | 0    | 1 | 1.61 | 1.53 | 1.33 | 1.34 | 17.67 | 22.22 | 29.71 | 17.97 |
| 31.2 | 22.5 | 12.5 | 30 | 27  | 1   | 10 | 200  | 4 | 1.55 | 1.61 | 1.55 | 1.45 | 21.13 | 23.79 | 22.69 | 17.8  |
| 31.3 | 22.5 | 12.5 | 60 | 15  | 240 | 0  | 1    | 3 | 1.61 | 1.66 | 1.6  | 1.53 | 21.96 | 21.57 | 24.31 | 22.72 |
| 31.4 | 22.5 | 12.5 | 90 | 0   | NA  | NA | 0    | 0 | 1.68 | NA   | NA   | 1.55 | 22.43 | NA    | NA    | 22.81 |
| 32.1 | 22.5 | 17.5 | 5  | 0   | 0   | 0  | 0    | 0 | 1.26 | 1.49 | 1.36 | 1.18 | 23.52 | 24.38 | 26.85 | 20.19 |
| 32.2 | 22.5 | 17.5 | 30 | 0   | 0   | 5  | 1    | 2 | 1.63 | 1.47 | 1.62 | 1.51 | 18.01 | 28.39 | 21.52 | 17.63 |

|      |      |      |    |    |      |    |      |   |      |      |      |      |       |       |       |       |
|------|------|------|----|----|------|----|------|---|------|------|------|------|-------|-------|-------|-------|
| 32.3 | 22.5 | 17.5 | 60 | 0  | NA   | 0  | 0    | 0 | 1.43 | NA   | 1.29 | 1.48 | 26.87 | NA    | 34.86 | 30.35 |
| 32.4 | 22.5 | 17.5 | 90 | 0  | NA   | NA | 0    | 0 | 1.53 | NA   | NA   | 1.41 | 25.99 | NA    | NA    | 28.29 |
| 33.1 | 22.5 | 22.5 | 5  | 0  | 0    | 0  | 0    | 0 | 1.6  | 1.4  | 1.31 | 1.48 | 18.78 | 21.8  | 29.48 | 20.39 |
| 33.2 | 22.5 | 22.5 | 30 | 4  | 6    | 0  | 0    | 2 | 1.61 | 1.47 | 1.19 | 1.51 | 20.66 | 21.66 | 22.71 | 20.07 |
| 33.3 | 22.5 | 22.5 | 60 | 0  | NA   | 35 | 0    | 0 | 1.56 | NA   | 1.35 | 1.04 | 22.93 | NA    | 35.44 | 28.09 |
| 33.4 | 22.5 | 22.5 | 90 | 0  | NA   | NA | 0    | 0 | 1.48 | NA   | NA   | NA   | 25.67 | NA    | NA    | NA    |
| 34.1 | 22.5 | 27.5 | 5  | 0  | 0    | 5  | 0    | 1 | 1.65 | 1.37 | 1.2  | 1.29 | 17.14 | 24.81 | 28.61 | 21.43 |
| 34.2 | 22.5 | 27.5 | 30 | 0  | 0    | 0  | 0    | 0 | 1.51 | 1.47 | 1.38 | 1.45 | 23.62 | 23.8  | 21.16 | 27.19 |
| 34.3 | 22.5 | 27.5 | 60 | 0  | NA   | 0  | 8150 | 1 | 1.53 | NA   | 1.52 | 1.58 | 23.81 | NA    | 26.71 | 22.32 |
| 34.4 | 22.5 | 27.5 | 90 | 0  | NA   | NA | 1200 | 1 | 1.59 | NA   | NA   | 1.29 | 23.01 | NA    | NA    | 23.69 |
| 35.1 | 22.5 | 32.5 | 5  | 0  | 1130 | 0  | 0    | 1 | 1.53 | 1.32 | 1.39 | 1.69 | 20.7  | 26.7  | 27.06 | 20.97 |
| 35.2 | 22.5 | 32.5 | 30 | 0  | 955  | 1  | 0    | 1 | 1.41 | 1.33 | 1.39 | 1.5  | 25.84 | 24.61 | 25.37 | 23.49 |
| 35.3 | 22.5 | 32.5 | 60 | 0  | 2175 | 2  | 0    | 2 | 1.55 | 1.61 | 1.55 | 1.52 | 24.67 | 20.8  | 25.2  | 22.8  |
| 35.4 | 22.5 | 32.5 | 90 | 0  | NA   | 0  | 0    | 0 | 1.49 | NA   | 1.6  | 1.32 | 23.35 | NA    | 22.84 | 22.14 |
| 36.1 | 27.5 | 2.5  | 5  | 0  | 0    | 0  | 0    | 0 | 1.67 | 1.61 | 1.5  | 1.65 | 16.61 | 19.77 | 24.93 | 16.07 |
| 36.2 | 27.5 | 2.5  | 30 | 0  | 0    | 0  | 0    | 0 | 1.58 | 1.51 | 1.45 | 1.42 | 20.36 | 23.09 | 23.8  | 20.1  |
| 36.3 | 27.5 | 2.5  | 60 | 0  | 0    | 0  | 0    | 0 | 1.61 | 1.53 | 1.59 | 1.46 | 21.83 | 24.23 | 25.21 | 22.75 |
| 36.4 | 27.5 | 2.5  | 90 | 0  | NA   | NA | 0    | 0 | 1.6  | NA   | NA   | 1.48 | 23.97 | NA    | NA    | 21.06 |
| 37.1 | 27.5 | 7.5  | 5  | 0  | 0    | 30 | 0    | 1 | 1.68 | 1.52 | 1.35 | 1.29 | 17.33 | 23.75 | 31.28 | 14.32 |
| 37.2 | 27.5 | 7.5  | 30 | 0  | 0    | 5  | 0    | 1 | 1.57 | 1.47 | 1.48 | 1.49 | 20.15 | 24.93 | 27.86 | 20.3  |
| 37.3 | 27.5 | 7.5  | 60 | 0  | 0    | 0  | 50   | 1 | 1.52 | 1.56 | 1.7  | 1.33 | 21.41 | 23.3  | 23.51 | 23.57 |
| 37.4 | 27.5 | 7.5  | 90 | 0  | NA   | NA | 0    | 0 | 1.62 | NA   | NA   | 1.58 | 22.82 | NA    | NA    | 22.35 |
| 38.1 | 27.5 | 12.5 | 5  | 25 | 0    | 0  | 0    | 1 | 1.41 | 1.43 | 1.35 | 1.45 | 25.44 | 27.39 | 29.94 | 18.18 |
| 38.2 | 27.5 | 12.5 | 30 | 0  | 0    | 0  | 0    | 0 | 1.52 | 1.56 | 1.57 | 1.55 | 22.21 | 21.02 | 25.98 | 20.99 |
| 38.3 | 27.5 | 12.5 | 60 | 0  | 0    | 0  | 0    | 0 | 1.61 | 1.61 | 1.66 | 1.49 | 22.11 | 21.82 | 26.88 | 22.59 |
| 38.4 | 27.5 | 12.5 | 90 | 5  | NA   | NA | 0    | 1 | 1.62 | NA   | NA   | 1.65 | 21.67 | NA    | NA    | 23.88 |
| 39.1 | 27.5 | 17.5 | 5  | 0  | 0    | 0  | 0    | 0 | 1.49 | 1.43 | 1.3  | 1.46 | 23.15 | 24.07 | 30.21 | 18.11 |
| 39.2 | 27.5 | 17.5 | 30 | 0  | 0    | 38 | 0    | 1 | 1.62 | 1.47 | 1.48 | 1.47 | 19.23 | 22.54 | 25.17 | 20.04 |
| 39.3 | 27.5 | 17.5 | 60 | 0  | 0    | 0  | 0    | 0 | 1.55 | NA   | 1.5  | 1.63 | 22.97 | NA    | 30.64 | 21.4  |
| 39.4 | 27.5 | 17.5 | 90 | 0  | NA   | NA | NA   | 0 | 1.61 | NA   | NA   | NA   | 23.43 | NA    | NA    | NA    |
| 40.1 | 27.5 | 22.5 | 5  | 0  | 1    | 0  | 0    | 1 | 1.4  | 1.36 | 1.34 | 1.38 | 25.48 | 26.76 | 27.93 | 20.96 |
| 40.2 | 27.5 | 22.5 | 30 | 0  | 0    | 0  | 0    | 0 | 1.64 | 1.54 | 1.55 | 1.55 | 19.28 | 19.29 | 24.81 | 19.17 |
| 40.3 | 27.5 | 22.5 | 60 | 0  | 0    | 0  | 10   | 1 | 1.46 | 1.49 | 1.51 | 1.35 | 26.72 | 23.11 | 26.7  | 26.54 |
| 40.4 | 27.5 | 22.5 | 90 | 0  | NA   | NA | 0    | 0 | 1.39 | NA   | NA   | 1.54 | 31.93 | NA    | NA    | 22.42 |
| 41.1 | 27.5 | 27.5 | 5  | 0  | 0    | 0  | 0    | 0 | 1.58 | 1.36 | 1.17 | 1.17 | 18.48 | 27.87 | 32.73 | 20.54 |
| 41.2 | 27.5 | 27.5 | 30 | 0  | 0    | 0  | 450  | 1 | 1.5  | 1.55 | 1.41 | 1.46 | 24.87 | 21.43 | 28.01 | 23.81 |
| 41.3 | 27.5 | 27.5 | 60 | 14 | NA   | 0  | 0    | 1 | 1.5  | NA   | 1.42 | 1.42 | 22.96 | NA    | 28.71 | 26.75 |
| 41.4 | 27.5 | 27.5 | 90 | 0  | NA   | NA | 0    | 0 | 1.53 | NA   | NA   | 1.39 | 24.65 | NA    | NA    | 23.14 |
| 42.1 | 27.5 | 32.5 | 5  | 0  | 0    | 0  | 0    | 0 | 1.36 | 1.37 | 1.44 | 1.4  | 30.8  | 25.91 | 26.14 | 24.61 |
| 42.2 | 27.5 | 32.5 | 30 | 0  | 0    | 0  | 0    | 0 | 1.38 | 1.55 | 1.43 | 1.21 | 26.7  | 24.51 | 25.3  | 25.95 |
| 42.3 | 27.5 | 32.5 | 60 | 0  | 0    | 0  | 25   | 1 | 1.58 | 1.54 | 1.64 | 1.41 | 25.11 | 19.3  | 22.92 | 23.51 |
| 42.4 | 27.5 | 32.5 | 90 | 0  | NA   | NA | 100  | 1 | 1.61 | NA   | NA   | 1.59 | 21.48 | NA    | NA    | 19.6  |
| 43.1 | 32.5 | 2.5  | 5  | 0  | 0    | 0  | 0    | 0 | 1.36 | 1.68 | 1.44 | 1.27 | 22.04 | 20.57 | 25.64 | 19.09 |
| 43.2 | 32.5 | 2.5  | 30 | 45 | 0    | 26 | 0    | 2 | 1.62 | 1.61 | 1.5  | 1.79 | 20.84 | 22.54 | 25.09 | 18.99 |

|      |      |      |    |     |    |     |      |   |      |      |      |      |       |       |       |       |
|------|------|------|----|-----|----|-----|------|---|------|------|------|------|-------|-------|-------|-------|
| 43.3 | 32.5 | 2.5  | 60 | 0   | 0  | 182 | 0    | 1 | 1.64 | 1.49 | 1.65 | 1.45 | 20.92 | 24.93 | 24.25 | 21.69 |
| 43.4 | 32.5 | 2.5  | 90 | 0   | NA | NA  | 400  | 1 | 1.59 | NA   | NA   | 1.36 | 22.19 | NA    | NA    | 22.57 |
| 44.1 | 32.5 | 7.5  | 5  | 0   | 0  | 0   | 0    | 0 | 1.63 | 1.37 | 1.45 | 1.36 | 17.22 | 23.38 | 27.19 | 19.29 |
| 44.2 | 32.5 | 7.5  | 30 | 0   | 0  | 4   | 0    | 1 | 1.64 | 1.5  | 1.52 | 1.4  | 17.93 | 22.48 | 25.59 | 21.26 |
| 44.3 | 32.5 | 7.5  | 60 | 0   | NA | 250 | 50   | 2 | 1.68 | NA   | 1.55 | 1.56 | 17.52 | NA    | 26.6  | 22.57 |
| 44.4 | 32.5 | 7.5  | 90 | 0   | NA | NA  | 0    | 0 | 1.71 | NA   | NA   | 1.51 | 15.79 | NA    | NA    | 24.89 |
| 45.1 | 32.5 | 12.5 | 5  | 0   | 0  | 8   | 1    | 1 | 1.66 | 1.45 | 1.44 | 1.23 | 17.49 | 24.52 | 28.59 | 18.62 |
| 45.2 | 32.5 | 12.5 | 30 | 0   | 0  | 0   | 1    | 1 | 1.53 | 1.56 | 1.63 | 1.59 | 21.13 | 25.3  | 22.34 | 19.95 |
| 45.3 | 32.5 | 12.5 | 60 | 0   | NA | 0   | 100  | 1 | 1.65 | NA   | 1.5  | 1.49 | 16.94 | NA    | 28.11 | 21.69 |
| 45.4 | 32.5 | 12.5 | 90 | 0   | NA | NA  | 10   | 1 | 1.62 | NA   | NA   | 1.45 | 19.76 | NA    | NA    | 22.83 |
| 46.1 | 32.5 | 17.5 | 5  | 0   | 50 | 0   | 1    | 2 | 1.51 | 1.48 | 1.32 | 1.27 | 18.99 | 24.17 | 30.32 | 18.3  |
| 46.2 | 32.5 | 17.5 | 30 | 200 | 50 | 0   | 0    | 2 | 1.53 | 1.54 | 1.48 | 1.26 | 18.63 | 22.17 | 23.43 | 19.38 |
| 46.3 | 32.5 | 17.5 | 60 | 10  | 0  | 1   | 0    | 1 | 1.65 | 1.53 | 1.54 | 1.36 | 18.29 | 21.63 | 22.11 | 28.94 |
| 46.4 | 32.5 | 17.5 | 90 | 70  | NA | NA  | 0    | 1 | 1.64 | NA   | NA   | 1.35 | 21.2  | NA    | NA    | 25.85 |
| 47.1 | 32.5 | 22.5 | 5  | 0   | 0  | 0   | 0    | 0 | 1.63 | 1.39 | 1.52 | 1.41 | 19.05 | 27.14 | 31.27 | 18.46 |
| 47.2 | 32.5 | 22.5 | 30 | 1   | 0  | 15  | 0    | 2 | 1.63 | 1.34 | 1.44 | 1.75 | 18.89 | 28.05 | 29.85 | 18.74 |
| 47.3 | 32.5 | 22.5 | 60 | 0   | NA | 50  | 0    | 1 | 1.65 | NA   | 1.49 | 1.14 | 18.66 | NA    | 24.87 | 23.12 |
| 47.4 | 32.5 | 22.5 | 90 | 31  | NA | NA  | 400  | 2 | 1.69 | NA   | NA   | 1.23 | 20.2  | NA    | NA    | 20.51 |
| 48.1 | 32.5 | 27.5 | 5  | 0   | 0  | 5   | 1    | 1 | 1.38 | 1.35 | 1.34 | 1.42 | 27.3  | 24.82 | 30.85 | 22.18 |
| 48.2 | 32.5 | 27.5 | 30 | 0   | 0  | 0   | 0    | 0 | 1.63 | 1.46 | 1.46 | 1.53 | 17.16 | 22.71 | 26.2  | 19.69 |
| 48.3 | 32.5 | 27.5 | 60 | 0   | NA | 0   | 0    | 0 | 1.54 | NA   | 1.21 | 1.5  | 22.83 | NA    | 32.66 | 23.82 |
| 48.4 | 32.5 | 27.5 | 90 | 0   | NA | NA  | 0    | 0 | 1.42 | NA   | NA   | 1.44 | 30.1  | NA    | NA    | 23.04 |
| 49.1 | 32.5 | 32.5 | 5  | 0   | 0  | 0   | 0    | 0 | 1.43 | 1.38 | 1.32 | 1.55 | 26.19 | 24.04 | 30.41 | 23.84 |
| 49.2 | 32.5 | 32.5 | 30 | 0   | 0  | 0   | 0    | 0 | 1.44 | 1.46 | 1.34 | 1.79 | 24.82 | 28.62 | 27.23 | 23.99 |
| 49.3 | 32.5 | 32.5 | 60 | 0   | NA | 0   | 0    | 0 | 1.59 | NA   | 1.66 | 1.44 | 24.22 | NA    | 22.71 | 23.57 |
| 49.4 | 32.5 | 32.5 | 90 | 0   | NA | NA  | 1550 | 1 | 1.6  | NA   | NA   | 1.52 | 23.51 | NA    | NA    | 21.5  |

Table s.2

| Sample | X (m) | Y (m) | Depth (cm) | Positivity | OM    | C Total | N Total | C/N  | P <sub>2</sub> O <sub>5</sub> | CEC  |
|--------|-------|-------|------------|------------|-------|---------|---------|------|-------------------------------|------|
| 1.1    | 2.5   | 2.5   | 5          | 0          | 16.6  | 9.6     | 0.855   | 11.2 | 0.009                         | 5.23 |
| 1.2    | 2.5   | 2.5   | 30         | 3          | 4.57  | 2.64    | 0.319   | 8.3  | 0.0049                        | 5.54 |
| 1.3    | 2.5   | 2.5   | 60         | 3          | 1.59  | 0.919   | 0.107   | 8.63 | 0.0049                        | 2.7  |
| 1.4    | 2.5   | 2.5   | 90         | 1          | 1.81  | 1.05    | 0.127   | 8.24 | 0.0049                        | 3.95 |
| 2.4    | 2.5   | 7.5   | 90         | 2          | 3.69  | 2.13    | 0.245   | 8.69 | 0.0049                        | 5.29 |
| 3.4    | 2.5   | 12.5  | 90         | 2          | 2.67  | 1.54    | 0.183   | 8.45 | 0.0049                        | 4.44 |
| 4.4    | 2.5   | 17.5  | 90         | 2          | 2.57  | 1.49    | 0.156   | 9.51 | 0.0049                        | 3.41 |
| 5.1    | 2.5   | 22.5  | 5          | 0          | 15    | 8.69    | 0.786   | 11.1 | 0.006                         | 4.79 |
| 5.2    | 2.5   | 22.5  | 30         | 0          | 3.12  | 1.8     | 0.216   | 8.34 | 0.0049                        | 3.92 |
| 5.3    | 2.5   | 22.5  | 60         | 3          | 1.82  | 1.05    | 0.124   | 8.46 | 0.0049                        | 2.65 |
| 5.4    | 2.5   | 22.5  | 90         | 0          | 1.66  | 0.957   | 0.102   | 9.39 | 0.0049                        | 2.48 |
| 6.1    | 2.5   | 27.5  | 5          | 0          | 18.4  | 10.6    | 1.08    | 9.84 | 0.008                         | 5.8  |
| 6.2    | 2.5   | 27.5  | 30         | 3          | 2.49  | 1.44    | 0.173   | 8.33 | 0.0049                        | 3.59 |
| 6.3    | 2.5   | 27.5  | 60         | 3          | 2.53  | 1.46    | 0.145   | 10.1 | 0.0049                        | 2.48 |
| 6.4    | 2.5   | 27.5  | 90         | 2          | 0.831 | 0.48    | 0.019   | 25.3 | 0.006                         | 1.49 |
| 8.1    | 7.5   | 2.5   | 5          | 0          | 13.9  | 8.03    | 0.728   | 11   | 0.0049                        | 5.26 |
| 8.2    | 7.5   | 2.5   | 30         | 4          | 7.65  | 4.42    | 0.512   | 8.63 | 0.0049                        | 7.32 |
| 8.3    | 7.5   | 2.5   | 60         | 3          | 2.89  | 1.67    | 0.205   | 8.14 | 0.0049                        | 3.69 |
| 8.4    | 7.5   | 2.5   | 90         | 1          | 1.54  | 0.888   | 0.0947  | 9.38 | 0.0049                        | 1.79 |
| 9.4    | 7.5   | 7.5   | 90         | 2          | 1.45  | 0.836   | 0.1     | 8.33 | 0.0049                        | 2.23 |
| 12.1   | 7.5   | 22.5  | 5          | 0          | 16.9  | 9.78    | 0.996   | 9.82 | 0.007                         | 5.69 |
| 12.2   | 7.5   | 22.5  | 30         | 1          | 6.13  | 3.54    | 0.387   | 9.14 | 0.0049                        | 6.05 |
| 12.3   | 7.5   | 22.5  | 60         | 3          | 8.26  | 4.78    | 0.572   | 8.35 | 0.0049                        | 12.7 |
| 12.4   | 7.5   | 22.5  | 90         | 2          | 8.51  | 4.92    | 0.515   | 9.56 | 0.0049                        | 11.8 |
| 13.1   | 7.5   | 27.5  | 5          | 0          | 16.6  | 9.59    | 0.946   | 10.1 | 0.009                         | 5.34 |
| 13.2   | 7.5   | 27.5  | 30         | 0          | 4.92  | 2.84    | 0.33    | 8.6  | 0.0049                        | 5.08 |
| 13.3   | 7.5   | 27.5  | 60         | 1          | 1.95  | 1.13    | 0.14    | 8.06 | 0.0049                        | 3.41 |
| 13.4   | 7.5   | 27.5  | 90         | 2          | 1.96  | 1.14    | 0.134   | 8.47 | 0.0049                        | 3.53 |
| 18.4   | 12.5  | 17.5  | 90         | 2          | 7.97  | 4.61    | 0.685   | 6.73 | 0.0049                        | 16.7 |
| 19.1   | 12.5  | 22.5  | 5          | 0          | 16    | 9.24    | 0.888   | 10.4 | 0.011                         | 5.54 |
| 19.2   | 12.5  | 22.5  | 30         | 1          | 7.75  | 4.48    | 0.49    | 9.15 | 0.0049                        | 7.03 |
| 19.3   | 12.5  | 22.5  | 60         | 3          | 4.26  | 2.46    | 0.349   | 7.04 | 0.0049                        | 7.92 |
| 19.4   | 12.5  | 22.5  | 90         | 2          | 3.04  | 1.76    | 0.253   | 6.94 | 0.0049                        | 5.98 |
| 21.3   | 12.5  | 32.5  | 60         | 3          | 6.46  | 3.73    | 0.477   | 7.83 | 0.0049                        | 11.8 |
| 22.1   | 17.5  | 2.5   | 5          | 1          | 14.9  | 8.58    | 0.83    | 10.3 | 0.01                          | 4.91 |
| 22.2   | 17.5  | 2.5   | 30         | 1          | 7.66  | 4.43    | 0.427   | 10.4 | 0.007                         | 6.36 |
| 22.3   | 17.5  | 2.5   | 60         | 1          | 5.39  | 3.11    | 0.366   | 8.51 | 0.0049                        | 8.43 |
| 22.4   | 17.5  | 2.5   | 90         | 2          | 3.74  | 2.16    | 0.271   | 7.98 | 0.0049                        | 5.87 |
| 25.4   | 17.5  | 17.5  | 90         | 2          | 8.64  | 4.99    | 0.776   | 6.44 | 0.0049                        | 19   |
| 27.4   | 17.5  | 27.5  | 90         | 2          | 5.19  | 3       | 0.383   | 7.84 | 0.0049                        | 8.16 |
| 28.4   | 17.5  | 32.5  | 90         | 2          | 1.72  | 0.994   | 0.125   | 7.96 | 0.0049                        | 3.04 |
| 29.1   | 22.5  | 2.5   | 5          | 0          | 12    | 6.95    | 0.634   | 11   | 0.011                         | 4.77 |
| 29.2   | 22.5  | 2.5   | 30         | 0          | 2.87  | 1.66    | 0.221   | 7.51 | 0.0049                        | 4.78 |
| 29.3   | 22.5  | 2.5   | 60         | 0          | 2.52  | 1.46    | 0.204   | 7.15 | 0.0049                        | 4.54 |
| 29.4   | 22.5  | 2.5   | 90         | 0          | 2.46  | 1.42    | 0.19    | 7.45 | 0.0049                        | 4.25 |
| 30.1   | 22.5  | 7.5   | 5          | 0          | 13.3  | 7.68    | 0.712   | 10.8 | 0.011                         | 4.47 |
| 30.2   | 22.5  | 7.5   | 30         | 0          | 3.52  | 2.04    | 0.261   | 7.81 | 0.0049                        | 5.22 |
| 30.3   | 22.5  | 7.5   | 60         | 0          | 2.4   | 1.39    | 0.198   | 7.03 | 0.0049                        | 4.59 |
| 30.4   | 22.5  | 7.5   | 90         | 2          | 2.14  | 1.23    | 0.169   | 7.3  | 0.0049                        | 3.87 |
| 31.2   | 22.5  | 12.5  | 30         | 4          | 7.24  | 4.18    | 0.469   | 8.92 | 0.006                         | 6.1  |
| 36.1   | 27.5  | 2.5   | 5          | 0          | 9.69  | 5.6     | 0.504   | 11.1 | 0.01                          | 4.33 |
| 36.2   | 27.5  | 2.5   | 30         | 0          | 3.48  | 2.01    | 0.261   | 7.71 | 0.006                         | 5.47 |
| 36.3   | 27.5  | 2.5   | 60         | 0          | 2.63  | 1.52    | 0.221   | 6.89 | 0.0049                        | 5.06 |
| 36.4   | 27.5  | 2.5   | 90         | 0          | 2     | 1.16    | 0.161   | 7.19 | 0.0049                        | 4.22 |
| 47.1   | 32.5  | 22.5  | 5          | 0          | 17.8  | 10.3    | 1       | 10.3 | 0.007                         | 6.2  |
| 47.2   | 32.5  | 22.5  | 30         | 2          | 6.97  | 4.03    | 0.409   | 9.84 | 0.0049                        | 7.01 |
| 47.3   | 32.5  | 22.5  | 60         | 1          | 6.31  | 3.65    | 0.38    | 9.59 | 0.0049                        | 8.3  |
| 47.4   | 32.5  | 22.5  | 90         | 2          | 1.42  | 0.822   | 0.0903  | 9.1  | 0.0049                        | 2.42 |



Table s.3

| Sample | X (m) | Y (m) | Depth | Positivity | pH   |
|--------|-------|-------|-------|------------|------|
| 1.1    | 2.5   | 2.5   | 5     | 0          | 5.58 |
| 1.3    | 2.5   | 2.5   | 60    | 3          | 3.78 |
| 1.4    | 2.5   | 2.5   | 90    | 1          | 4.87 |
| 2.1    | 2.5   | 7.5   | 5     | 0          | 4.2  |
| 2.2    | 2.5   | 7.5   | 30    | 1          | 4.63 |
| 3.1    | 2.5   | 12.5  | 5     | 0          | 4.06 |
| 3.2    | 2.5   | 12.5  | 30    | 2          | 4.1  |
| 3.3    | 2.5   | 12.5  | 60    | 2          | 4.09 |
| 3.4    | 2.5   | 12.5  | 90    | 2          | 4.55 |
| 4.1    | 2.5   | 17.5  | 5     | 1          | 5.02 |
| 4.2    | 2.5   | 17.5  | 30    | 1          | 4.53 |
| 4.3    | 2.5   | 17.5  | 60    | 2          | 4.81 |
| 4.4    | 2.5   | 17.5  | 90    | 2          | 5.5  |
| 5.2    | 2.5   | 22.5  | 30    | 0          | 4.82 |
| 5.3    | 2.5   | 22.5  | 60    | 3          | 4.29 |
| 6.1    | 2.5   | 27.5  | 5     | 0          | 4.91 |
| 6.3    | 2.5   | 27.5  | 60    | 3          | 4.46 |
| 6.4    | 2.5   | 27.5  | 90    | 2          | 5.08 |
| 8.2    | 7.5   | 2.5   | 30    | 4          | 4.99 |
| 8.3    | 7.5   | 2.5   | 60    | 3          | 4.43 |
| 9.1    | 7.5   | 7.5   | 5     | 2          | 4.65 |
| 9.3    | 7.5   | 7.5   | 60    | 2          | 3.86 |
| 9.4    | 7.5   | 7.5   | 90    | 2          | 4.58 |
| 11.1   | 7.5   | 17.5  | 5     | 0          | 4.61 |
| 11.3   | 7.5   | 17.5  | 60    | 2          | 3.77 |
| 12.1   | 7.5   | 22.5  | 5     | 0          | 5.12 |
| 12.2   | 7.5   | 22.5  | 30    | 1          | 3.91 |
| 12.3   | 7.5   | 22.5  | 60    | 3          | 4.19 |
| 12.4   | 7.5   | 22.5  | 90    | 2          | 4.54 |
| 13.1   | 7.5   | 27.5  | 5     | 0          | 3.68 |
| 13.2   | 7.5   | 27.5  | 30    | 0          | 4.09 |
| 13.3   | 7.5   | 27.5  | 60    | 1          | 4.14 |
| 14.3   | 7.5   | 32.5  | 60    | 1          | 4.74 |
| 15.1   | 12.5  | 2.5   | 5     | 1          | 4.17 |
| 18.1   | 12.5  | 17.5  | 5     | 1          | 4.18 |
| 19.1   | 12.5  | 22.5  | 5     | 0          | 4.65 |
| 19.2   | 12.5  | 22.5  | 30    | 1          | 3.52 |
| 19.3   | 12.5  | 22.5  | 60    | 3          | 3.64 |
| 19.4   | 12.5  | 22.5  | 90    | 2          | 4.73 |
| 20.1   | 12.5  | 27.5  | 5     | 0          | 3.76 |
| 20.2   | 12.5  | 27.5  | 30    | 1          | 3.55 |
| 20.3   | 12.5  | 27.5  | 60    | 2          | 3.38 |
| 21.1   | 12.5  | 32.5  | 5     | 1          | 3.64 |
| 21.2   | 12.5  | 32.5  | 30    | 2          | 3.6  |
| 21.3   | 12.5  | 32.5  | 60    | 3          | 3.54 |
| 22.2   | 17.5  | 2.5   | 30    | 1          | 4.65 |
| 22.3   | 17.5  | 2.5   | 60    | 1          | 4.2  |
| 23.1   | 17.5  | 7.5   | 5     | 0          | 3.74 |
| 23.2   | 17.5  | 7.5   | 30    | 2          | 3.83 |
| 25.1   | 17.5  | 17.5  | 5     | 0          | 4.64 |
| 25.4   | 17.5  | 17.5  | 90    | 2          | 4.68 |
| 26.1   | 17.5  | 22.5  | 5     | 1          | 4.28 |
| 26.2   | 17.5  | 22.5  | 30    | 2          | 3.76 |
| 28.2   | 17.5  | 32.5  | 30    | 1          | 3.87 |
| 29.1   | 22.5  | 2.5   | 5     | 0          | 4.8  |
| 29.3   | 22.5  | 2.5   | 60    | 0          | 4.1  |
| 29.4   | 22.5  | 2.5   | 90    | 0          | 4.68 |
| 30.2   | 22.5  | 7.5   | 30    | 0          | 4.64 |
| 30.3   | 22.5  | 7.5   | 60    | 0          | 4.36 |
| 31.1   | 22.5  | 12.5  | 5     | 1          | 4.64 |
| 31.2   | 22.5  | 12.5  | 30    | 4          | 4.17 |
| 31.3   | 22.5  | 12.5  | 60    | 3          | 4.03 |
| 33.3   | 22.5  | 22.5  | 60    | 0          | 3.85 |
| 34.2   | 22.5  | 27.5  | 30    | 0          | 4.16 |

|      |      |      |    |   |      |
|------|------|------|----|---|------|
| 34.3 | 22.5 | 27.5 | 60 | 1 | 4.29 |
| 35.1 | 22.5 | 32.5 | 5  | 1 | 4.17 |
| 35.2 | 22.5 | 32.5 | 30 | 1 | 3.92 |
| 36.1 | 27.5 | 2.5  | 5  | 0 | 4.75 |
| 36.2 | 27.5 | 2.5  | 30 | 0 | 4.38 |
| 36.3 | 27.5 | 2.5  | 60 | 0 | 4.24 |
| 36.4 | 27.5 | 2.5  | 90 | 0 | 4.71 |
| 37.2 | 27.5 | 7.5  | 30 | 1 | 4.23 |
| 37.3 | 27.5 | 7.5  | 60 | 1 | 4.25 |
| 38.1 | 27.5 | 12.5 | 5  | 1 | 4.42 |
| 38.2 | 27.5 | 12.5 | 30 | 0 | 4.04 |
| 38.3 | 27.5 | 12.5 | 60 | 0 | 4.29 |
| 39.2 | 27.5 | 17.5 | 30 | 1 | 3.9  |
| 39.3 | 27.5 | 17.5 | 60 | 0 | 4.37 |
| 39.4 | 27.5 | 17.5 | 90 | 0 | 4.5  |
| 40.1 | 27.5 | 22.5 | 5  | 1 | 4.17 |
| 40.2 | 27.5 | 22.5 | 30 | 0 | 3.77 |
| 40.3 | 27.5 | 22.5 | 60 | 1 | 3.87 |
| 41.4 | 27.5 | 27.5 | 90 | 0 | 4.34 |
| 42.3 | 27.5 | 32.5 | 60 | 1 | 4.53 |
| 43.2 | 32.5 | 2.5  | 30 | 2 | 3.83 |
| 43.3 | 32.5 | 2.5  | 60 | 1 | 3.46 |
| 44.1 | 32.5 | 7.5  | 5  | 0 | 3.89 |
| 44.4 | 32.5 | 7.5  | 90 | 0 | 5.18 |
| 45.1 | 32.5 | 12.5 | 5  | 1 | 5.22 |
| 45.2 | 32.5 | 12.5 | 30 | 1 | 3.9  |
| 45.3 | 32.5 | 12.5 | 60 | 1 | 3.96 |
| 45.4 | 32.5 | 12.5 | 90 | 1 | 5.13 |
| 46.1 | 32.5 | 17.5 | 5  | 2 | 4.03 |
| 46.2 | 32.5 | 17.5 | 30 | 2 | 4.19 |
| 47.2 | 32.5 | 22.5 | 30 | 2 | 4.85 |
| 47.3 | 32.5 | 22.5 | 60 | 1 | 4.77 |
| 48.1 | 32.5 | 27.5 | 5  | 1 | 4.67 |
| 49.4 | 32.5 | 32.5 | 90 | 1 | 4.48 |

**Figure S.1**

Violin plots of the the log(CFU) for each sampling round and sampling depth. The white dot indicates the median of the data; the back rectangular box indicates the interquartile range; the thin horizontal line is the 95% confidence interval; the grey area is a kernel density distribution, i.e. an estimation of the probability density function of log(CFU).

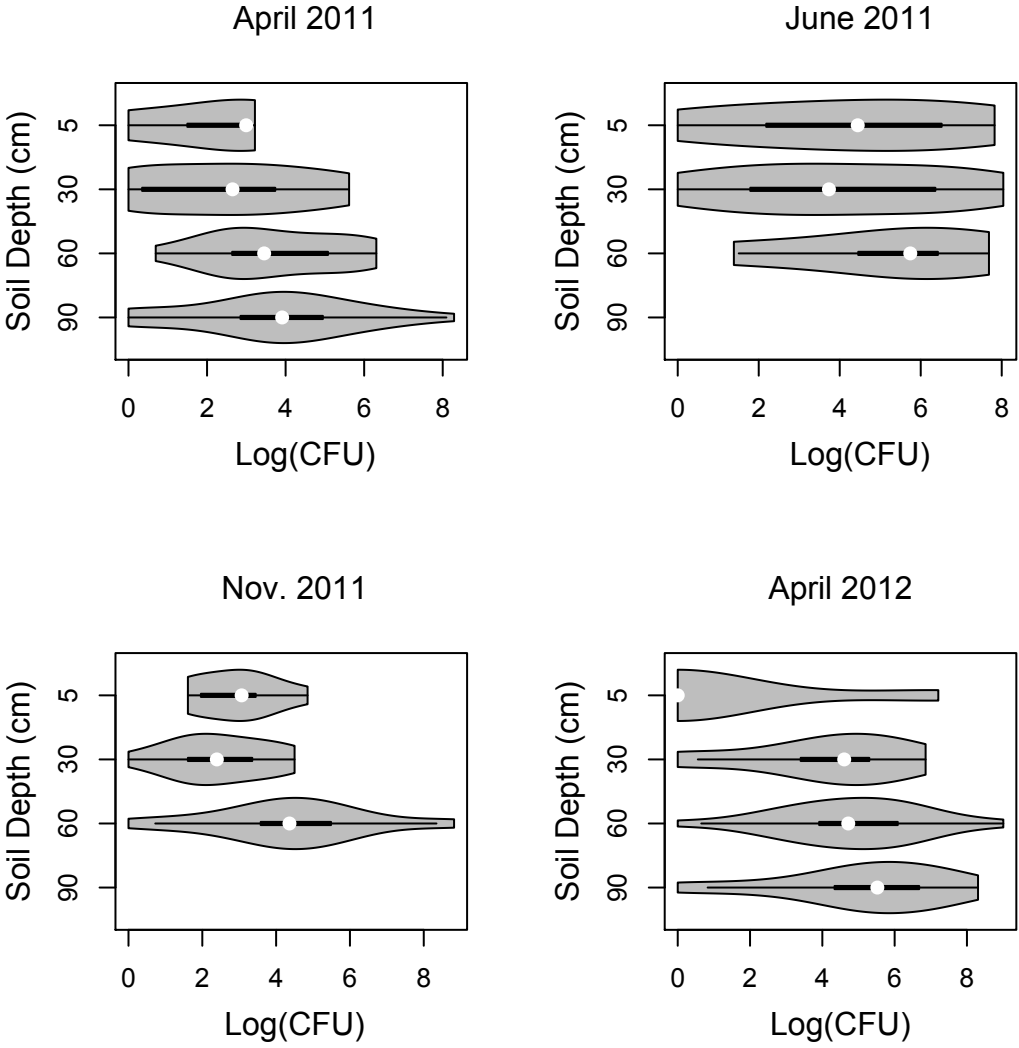

**Figure S.2**

Directional semivariograms for log-transformed counts ( $\text{cfu g}^{-1} \text{ soil} + 1$ ) of *B. pseudomallei* as a function of lag distance (in meters). (a) April 2011 (b) June 2011 (c) November 2011 (d) April 2012. Dots and circles correspond to E-W and N-S direction, respectively; thick and thin dashed lines represent the ordinary least square models fitted to the E-W and N-S directional semivariograms, respectively. Range of spatial autocorrelation for log CFU count was 7.6 meters, and range of spatial autocorrelation for presence of the organism was 7.1 meters.

**a**

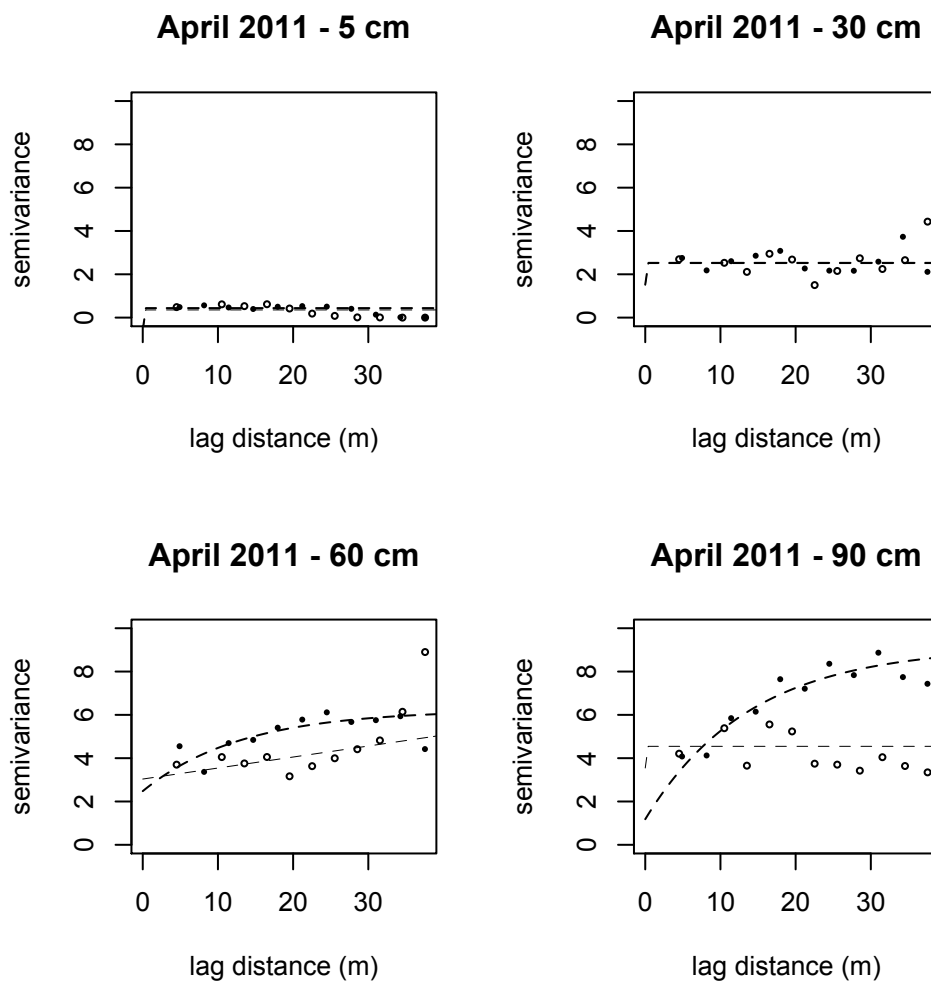

**b**

**June 2011 - 5 cm**

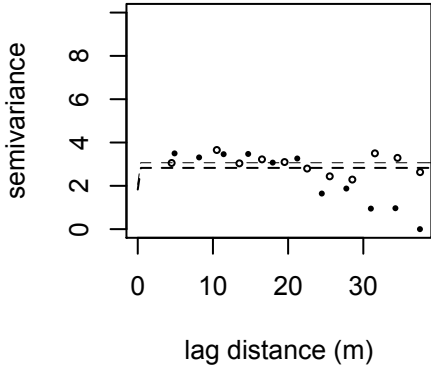

**June 2011 - 30 cm**

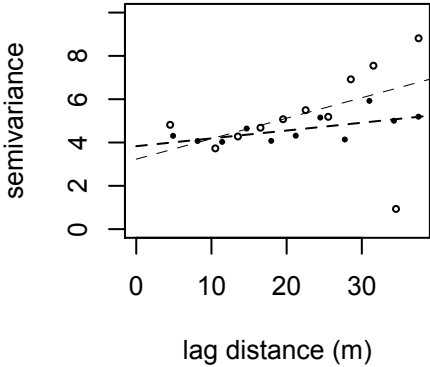

**c**

**Nov 2011 - 5 cm**

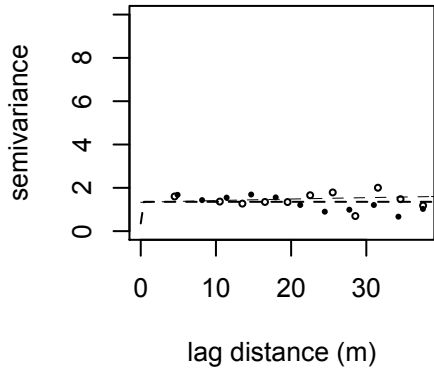

**Nov 2011 - 30 cm**

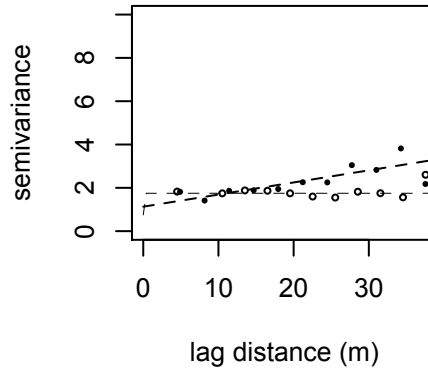

**Nov 2011 - 60 cm**

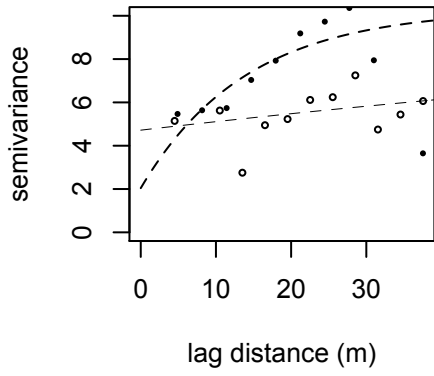

**d**

**Apr 2012 - 5 cm**

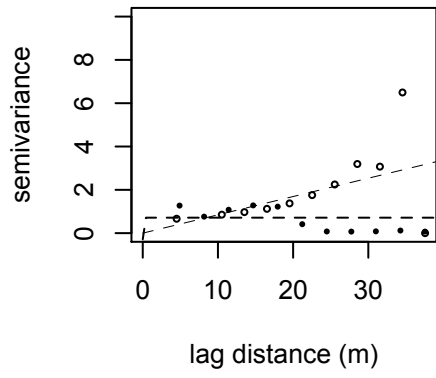

**Apr 2012 - 30 cm**

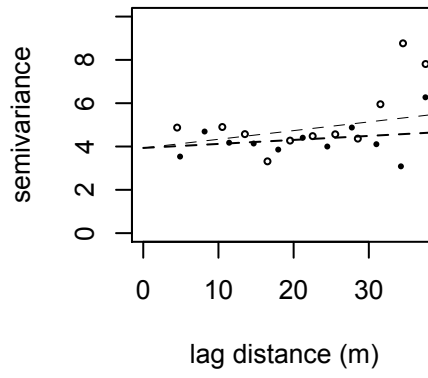

**Apr 2012 - 60 cm**

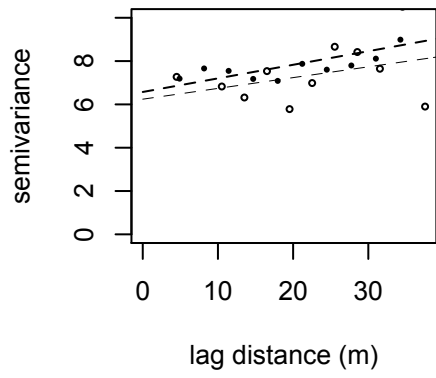

**Apr 2012 - 90 cm**

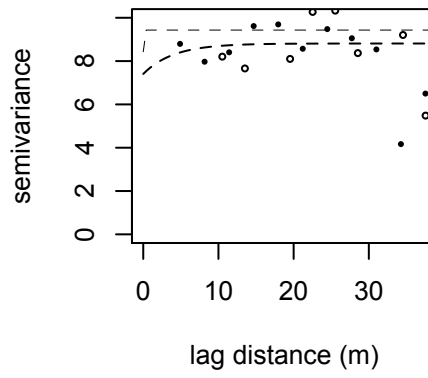

Supplement: 41598_2017_2946_MOESM1_ESM.pdf [file 41598_2017_2946_MOESM1_ESM.pdf]
